# Supplementary material for: The Environment Affects Epistatic Interactions to Alter the Topology of an Empirical Fitness Landscape
Source: PubMed Central journal article supplement (PMC3616912; doi:10.1371/journal.pgen.1003426), 2013-04-04

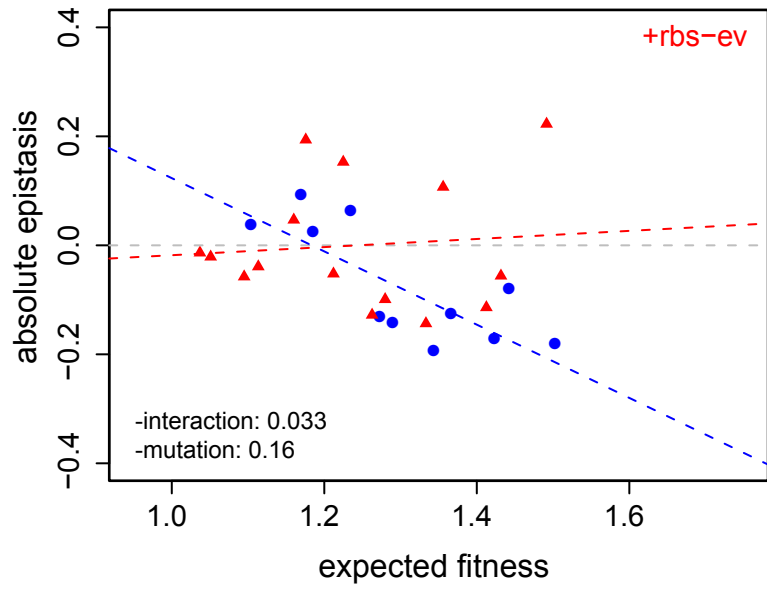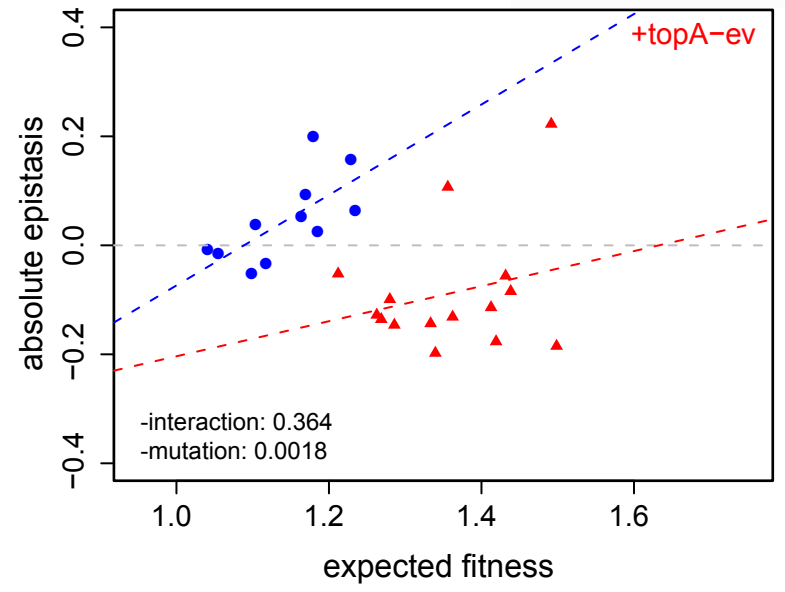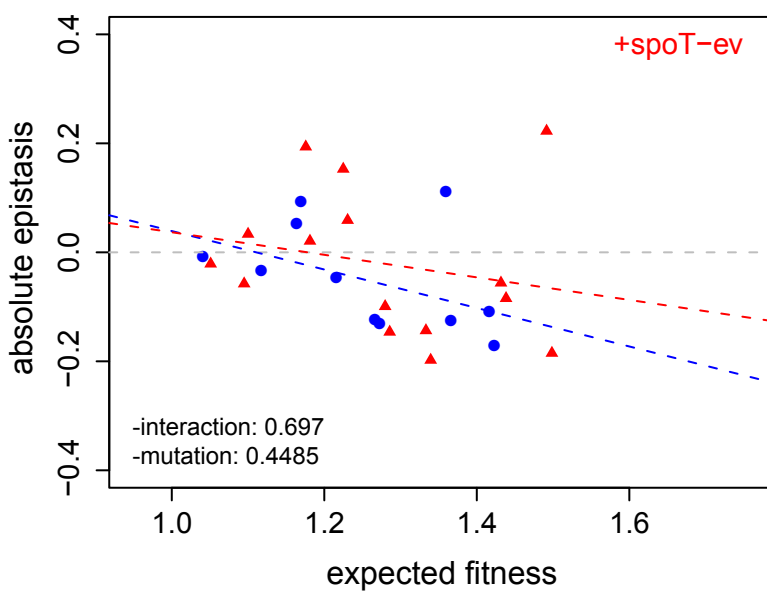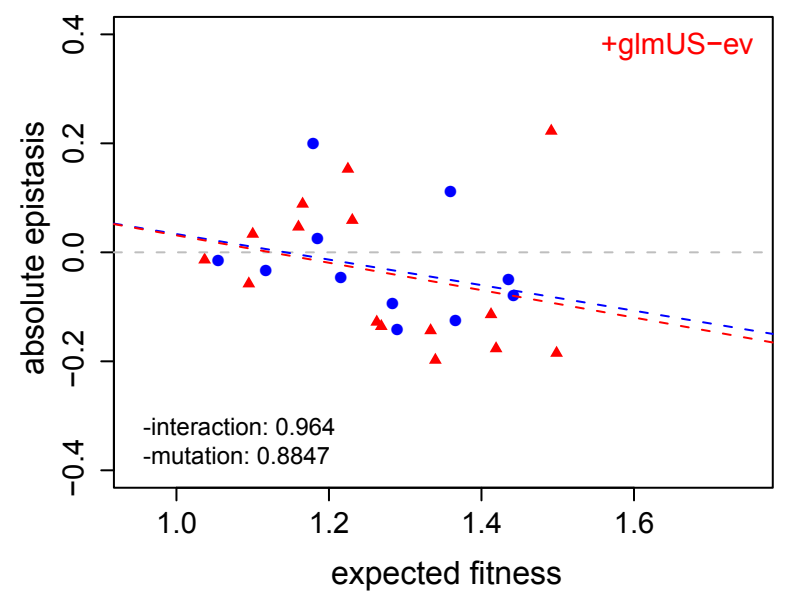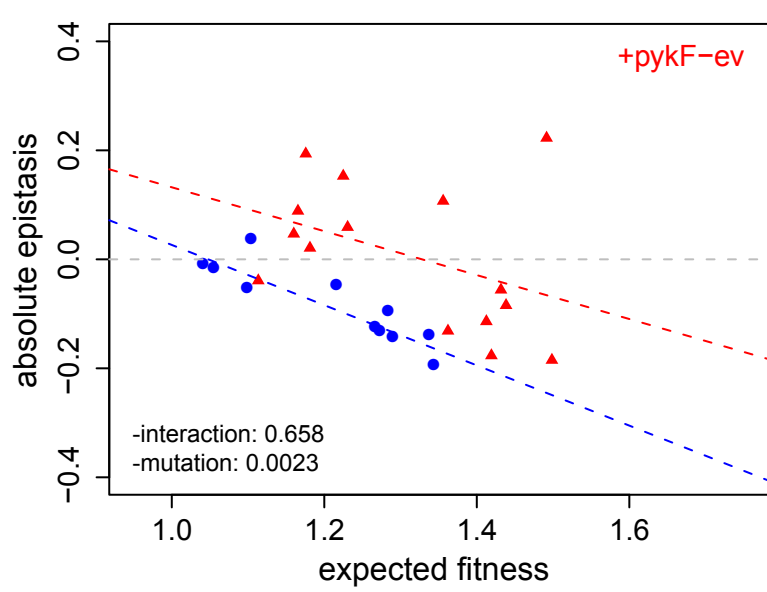

Supplement: pgen.1003426.s004.pdf [file pgen.1003426.s004.pdf]
